# Supplementary material for: Regioselective synthesis of a vitamin K3 based dihydrobenzophenazine derivative: its novel crystal structure and DFT studies
Source: Royal Society of Chemistry journal article supplement (doi:10.1039/c5ra13169c), 2015-01-01
Supplement: c5ra13169c1.pdf [file c5ra13169c1.pdf]

## Regioselective Synthesis of Vitamin K<sub>3</sub> Based Dihydrobenzophenazine Derivative: Their Novel Crystal Structure and DFT Studies

*Dattatray Chadar<sup>a</sup>, Soniya S. Rao<sup>a</sup>, Shridhar P. Gejji<sup>a</sup>, Bharat Ugale<sup>b</sup>, C.M. Nagraja<sup>b</sup>, Milind Nikalje<sup>a</sup> and Sunita Salunke-Gawali<sup>a\*</sup>*

### Supplementary material

#### Synthesis of 1

1 g of menadione (5.80 mM) was taken in a round bottom flask. About 30 ml methanol was added to it just so that it dissolves. After stirring the solution on a magnetic stirrer for about 15 minutes, about 0.625 g of o-phenylenediamine (5.80 mM) was added to it. The reaction was refluxed for 30 hrs with constant stirring at 60-70°C. During this time the progress of the reaction was monitored using thin layer chromatography. The reaction mixture was transferred to a beaker and kept for 5 days for the solvent to evaporate. The solid crude product was obtained by evaporation. The crude product was purified by column chromatography using toluene: methanol (9.5:0.5) as eluent. Dark orange colored crystals obtained by slow evaporation the solvent (toluene).

#### General Materials and Methods

The materials used viz vitamin K<sub>3</sub> (2-methyl-1,4-naphthoquinone), 2-aminophenol, O-phenylenediamine were purchased from Sigma-Aldrich. The solvents used such as toluene, methanol are of analytical grade were purchased from Merck Chemicals. Solvents were distilled by standard methods and dried wherever necessary. The FT-IR spectra of the compounds were recorded between 4000-400 cm<sup>-1</sup> as KBr pellets on SHIMADZU FT 8400 spectrometer. Mass of compound was determined by GC-MS 2010-eV (Make SHIMADZU). Melting points of compound were determined using melting point apparatus (Make-METTLER) and were corrected using DSC (Differential Scanning Calorimetry) (Make- TA Q2000). UV-Visible spectra of compound were recorded on SHIMADZU UV 1650 in DMSO between 200 to 800 nm. <sup>1</sup>H, <sup>13</sup>CNMR and 2D gHSQCAD of compounds was recorded in CDCl<sub>3</sub> on Varian mercury

500 MHz NMR instrument; TMS (tetramethylsilane) was used as the internal reference. Elemental analysis was performed on Elementar Vario EL III.

## Figure legends

- Fig.S1 LC-MS spectra of **1**
- Fig.S2 FT-IR spectrums of vitamin K3 in region 4000  $\text{cm}^{-1}$  to 400  $\text{cm}^{-1}$  (vitamin K3 = 2-methyl-1,4-naphthaquinone)
- Fig.S3 FT-IR spectrums of **1** in region 4000  $\text{cm}^{-1}$  to 400  $\text{cm}^{-1}$
- Fig.S4 <sup>1</sup>Characteristic FT-IR frequencies of vitamin K3 and **1**. (a)  $\nu_{\text{N-H}}$  region  
(b)  $\nu_{\text{C=O}}$  and  $\nu_{\text{C-N}}$  region
- Fig.S5 DSC plot of **1**
- Fig.S6 a) <sup>1</sup>H, b) <sup>13</sup>C NMR spectra of **1**
- Fig.S7 2D gHSQCAD NMR spectra of **1** of saturated carbon
- Fig.S8 2D gHSQCAD NMR spectra of **1** in aromatic region
- Fig.S9 UV-Visible spectra of vitamin K3 and **1** in DMSO with concentration  $\sim 1 \times 10^{-4}$  M
- Fig.S10 HOMO and LUMO orbitals of **1** (Isosurface value of  $-17.5 \text{ kJ mol}^{-1}$ )
- Fig.S11 Observed and optimized IR spectra of **1**

## Table legends

- Table S1 Crystallographic data of **1**
- Table S2 Selected bond lengths ( $\text{\AA}$ ) and angles ( $^{\circ}$ ) for **1**

# LCMS REPORT

Sample Information  
Acquired by : Admin  
Date Acquired : 9/17/2014 7:06:47 PM  
Sample Name : AP TT1-5  
Sample ID : MD-12DA  
Data File : 075.lcd  
Method File : LCMS METHOD  
AR number :  
Analysed By : LCMS-03-170914-75  
Method:-METHOD  
Column :YMC TRIART ,50mm X4.6 mm.3  $\mu$   
Mobile Phase: A. 5mM Ammonium Formate in water + 0.1% Ammonia  
B. Acetonitrile + 5% Solvent A + 0.1% Ammonia  
Inj Volume: .5 $\mu$ L, Flow Rate: 1.400 mL/minute  
Gradient program:  
10% B to 95% B in 2.5 minute, Hold till 3.00 min  
At 4.00min B conc is 10 % hold up to 4.5 min

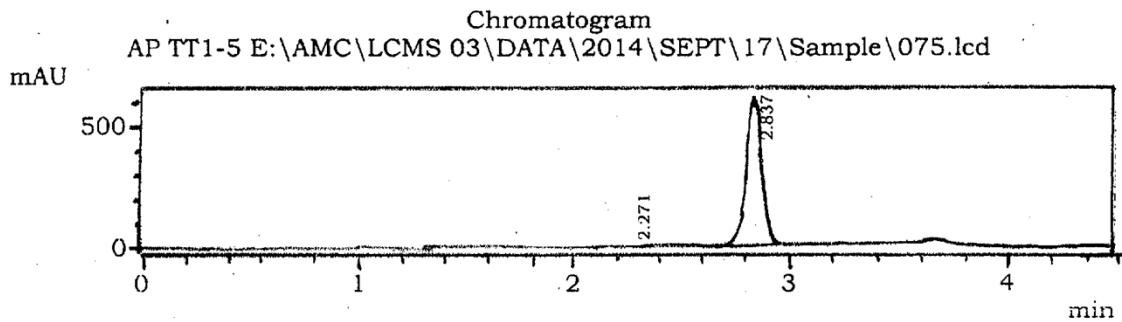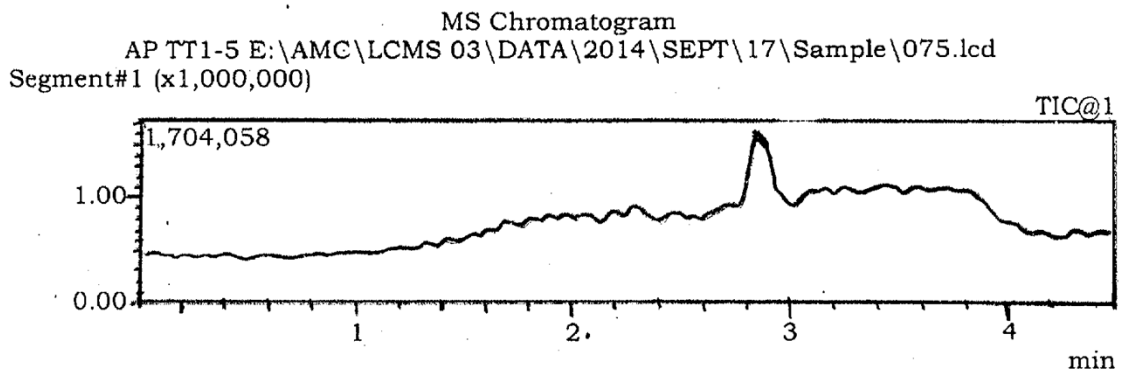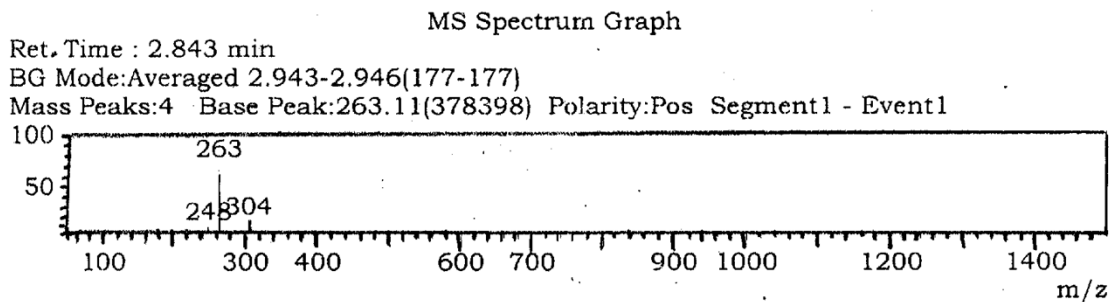

PeakTable

PDA Ch1 210nm - 400nm 4nm

| Peak# | Ret. Time | Area   | Area %  |
|-------|-----------|--------|---------|
| 1     | 3.347     | 1504   | 0.768   |
| 2     | 3.810     | 193068 | 98.537  |
| 3     | 3.915     | 1362   | 0.695   |
| Total |           | 195933 | 100.000 |

Fig.S1LC-MS spectra of 1

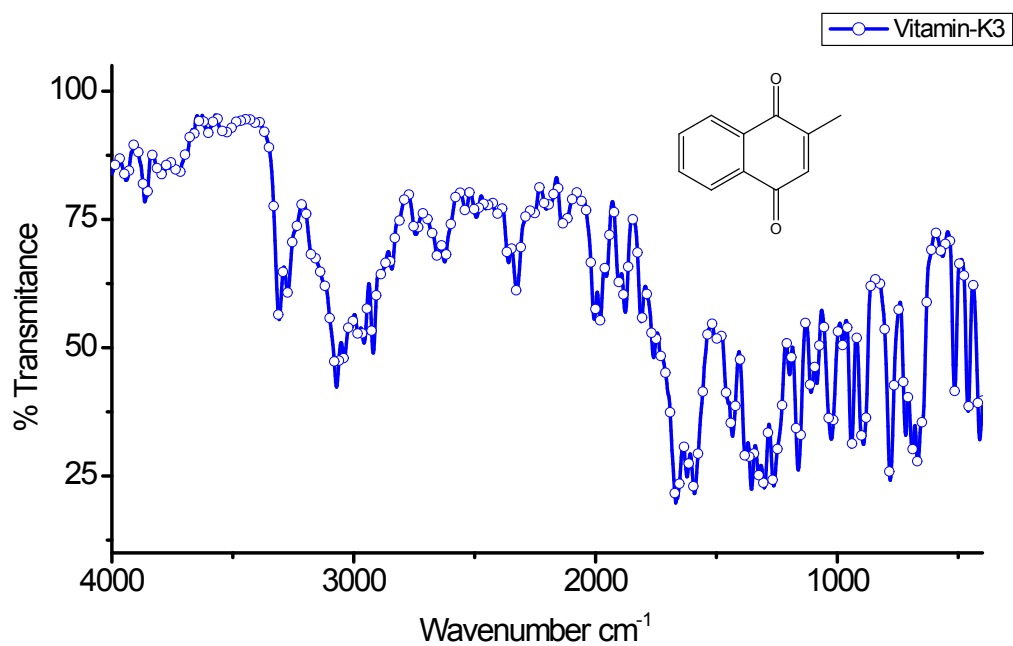

Fig.S2 FT-IR spectrums of Vitamin-K3 in region  $4000 \text{ cm}^{-1}$  to  $400 \text{ cm}^{-1}$

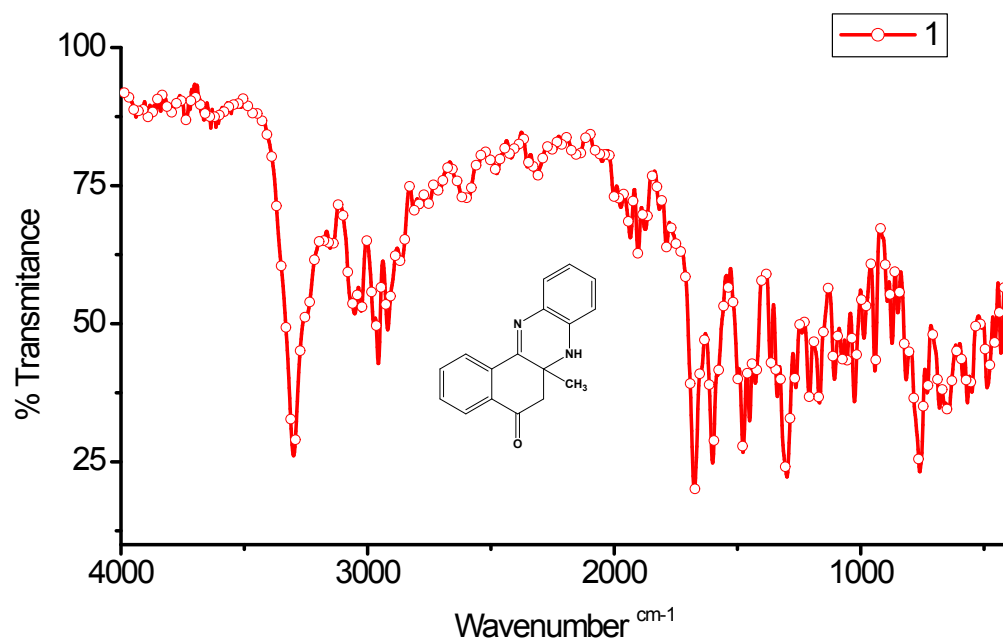

Fig.S3 FT-IR spectrums of **1** in region  $4000 \text{ cm}^{-1}$  to  $400 \text{ cm}^{-1}$

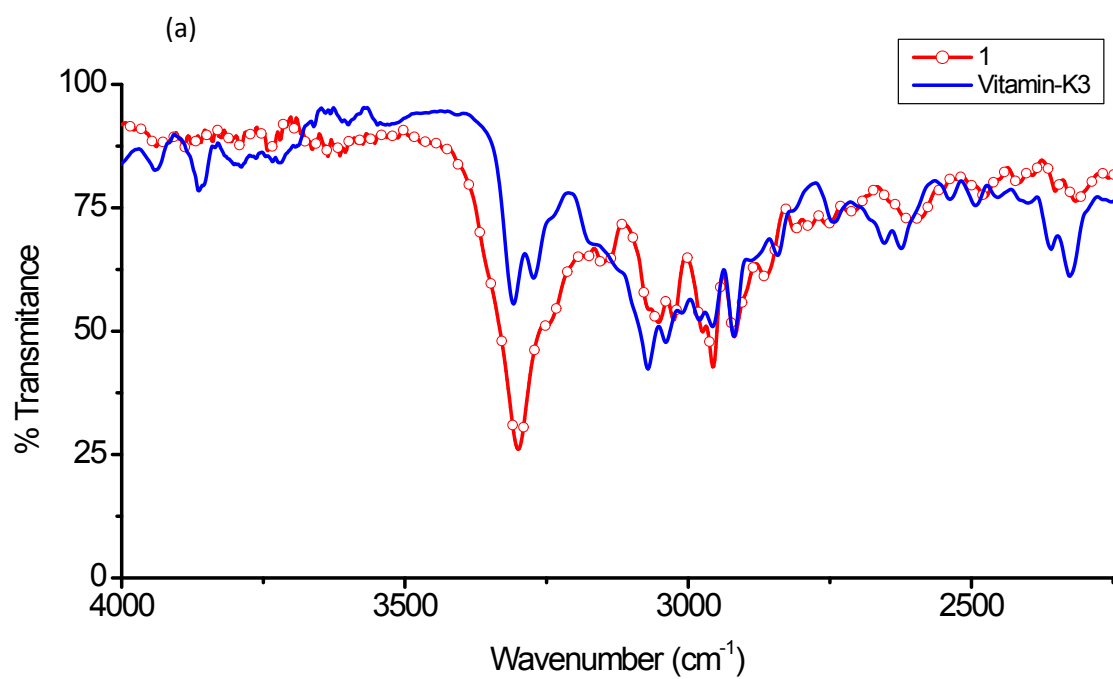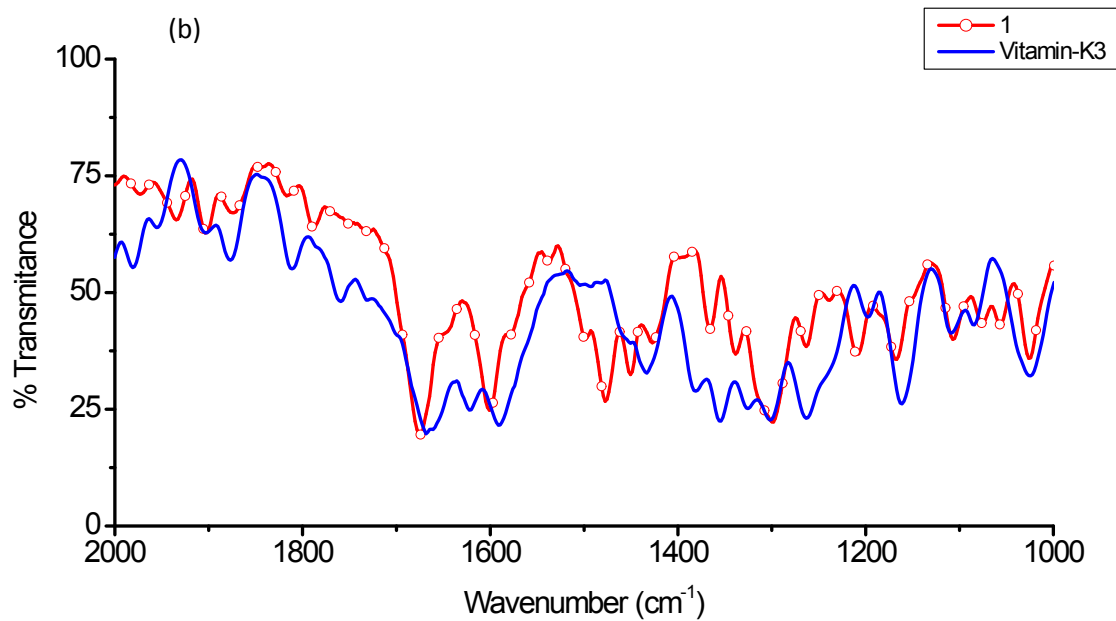

Fig.S4 Characteristic FT-IR frequencies of vitamin K3 and **1**. (a)  $\nu_{\text{N-H}}$  region (b)  $\nu_{\text{C=O}}$  and  $\nu_{\text{C-N}}$  region

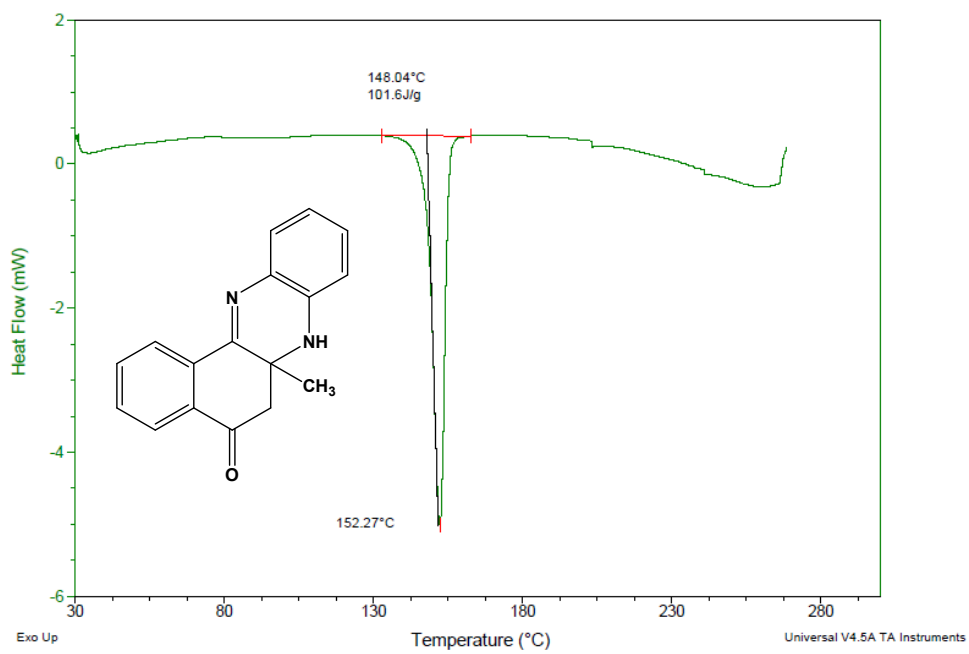

Fig.S5DSC plot of 1

(a)

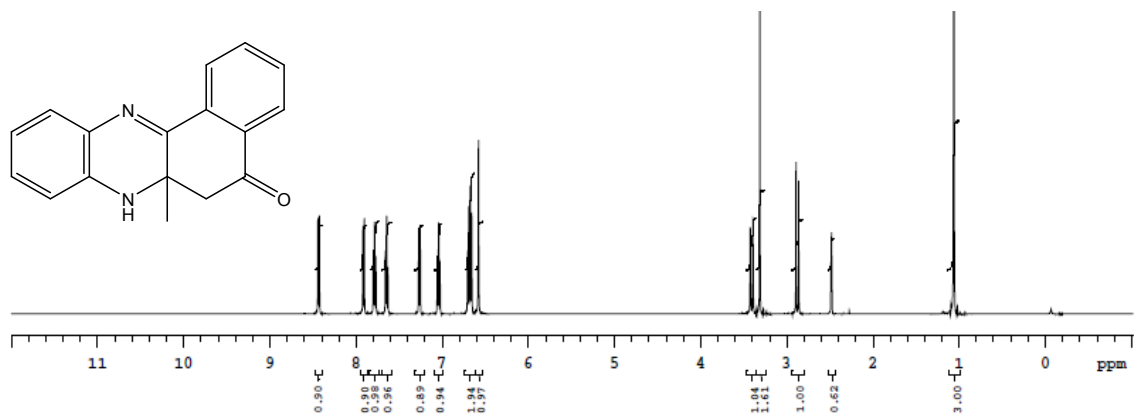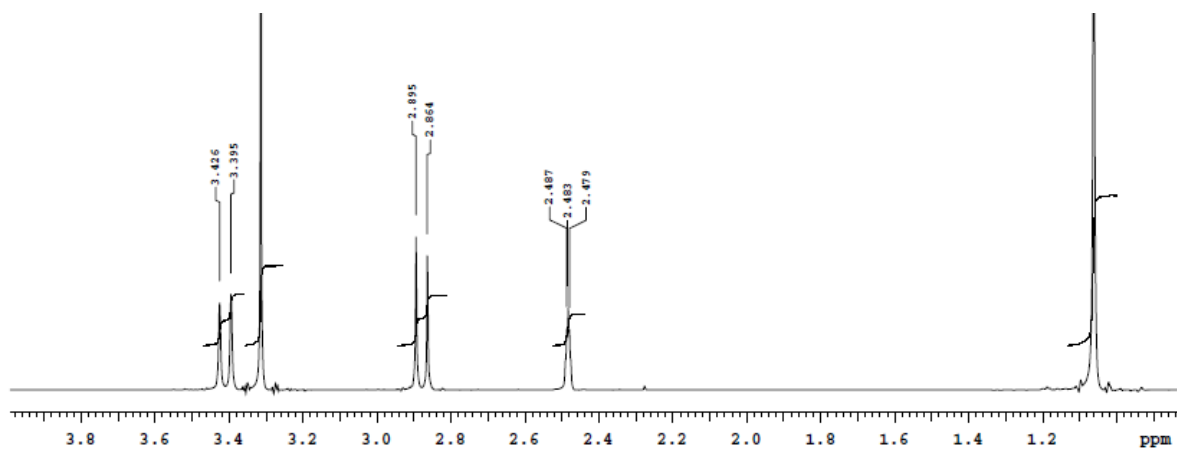



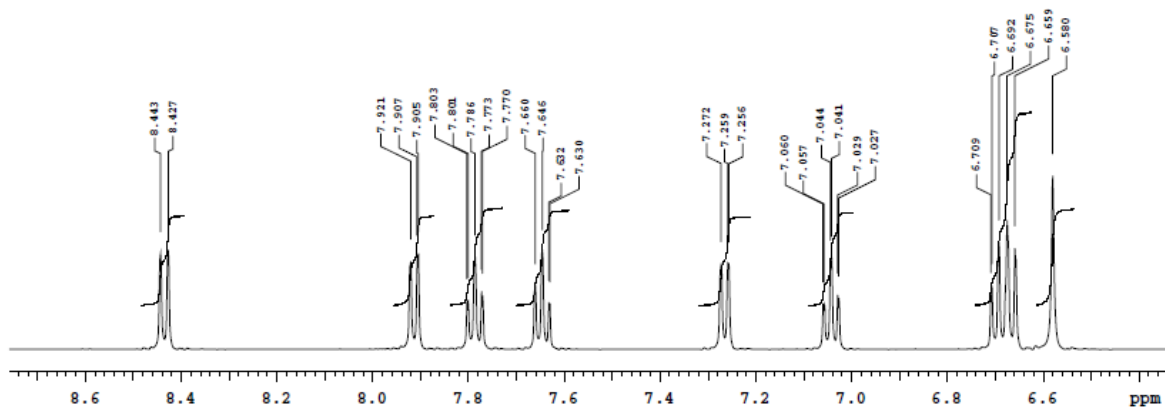

(b)

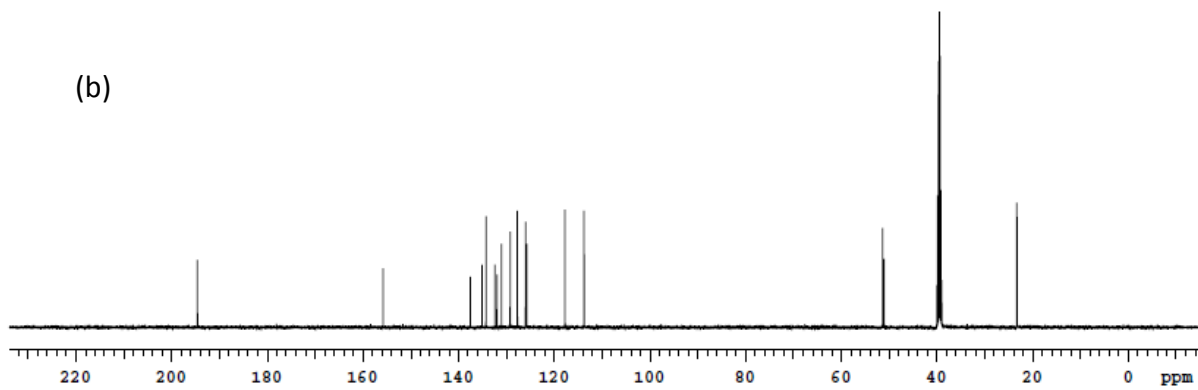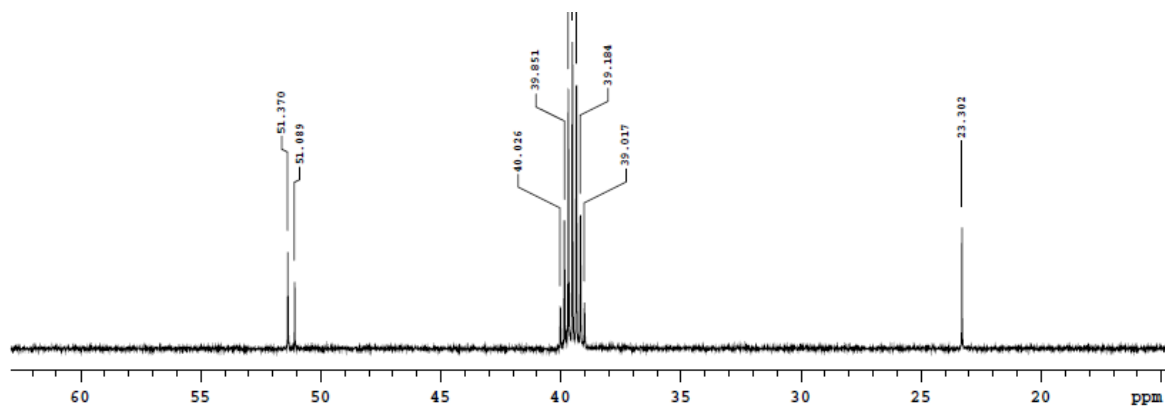

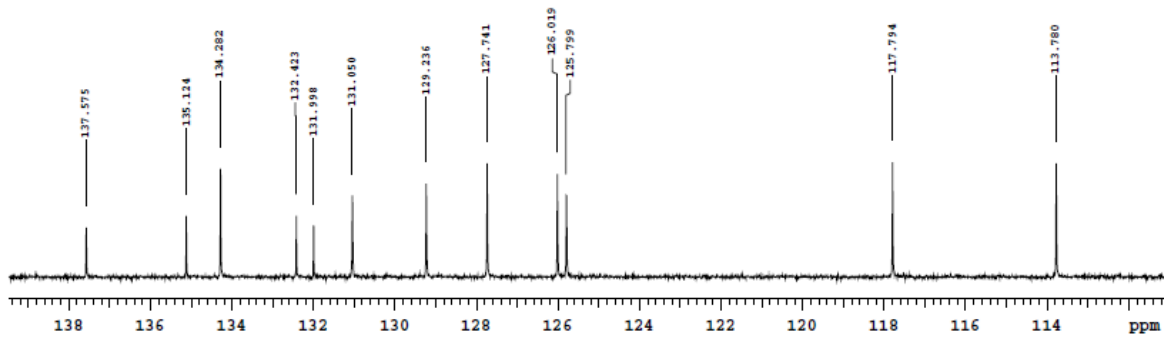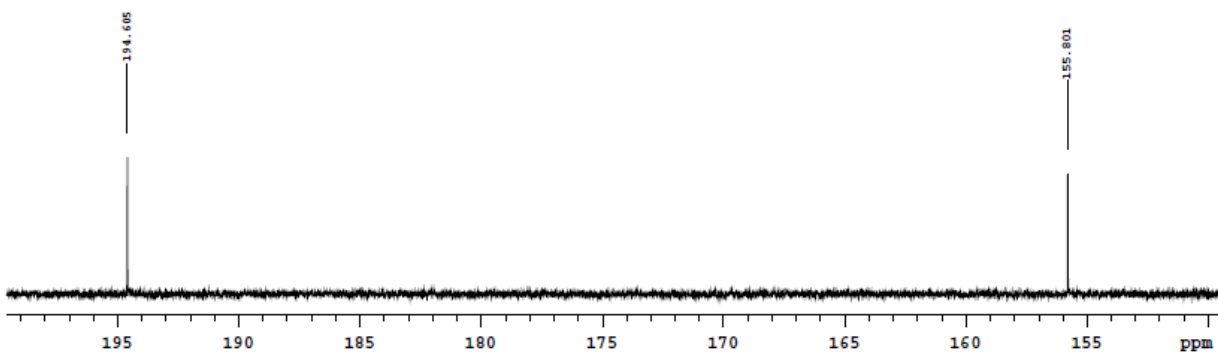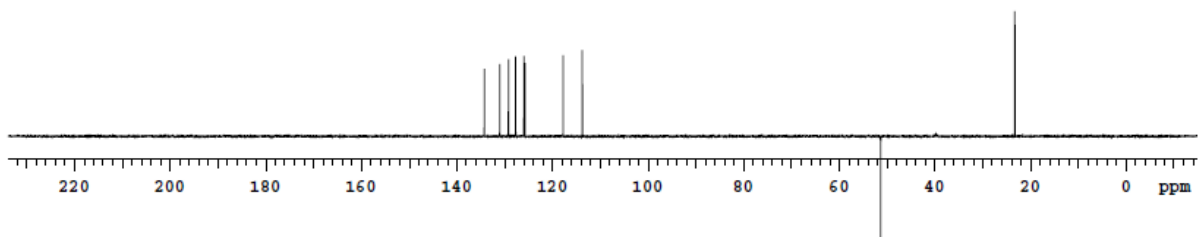

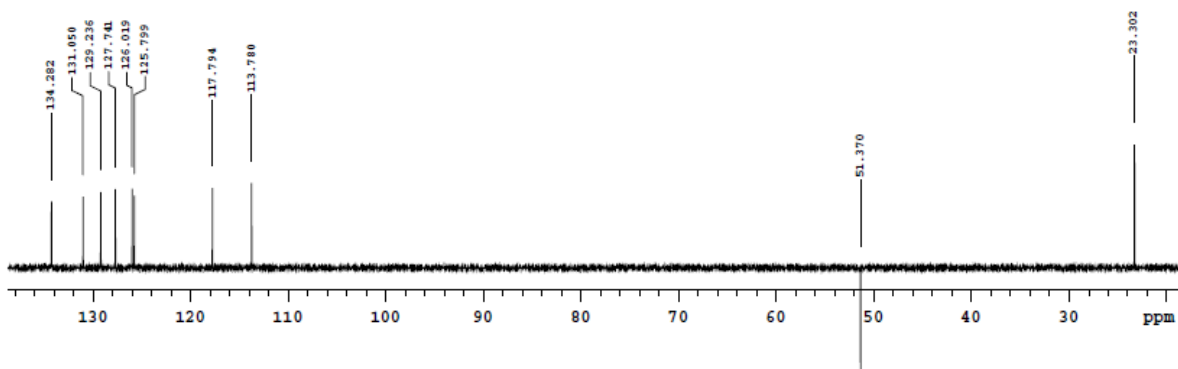

Fig.S6 a)  $^1\text{H}$ , b)  $^{13}\text{C}$  NMR spectra of **1**

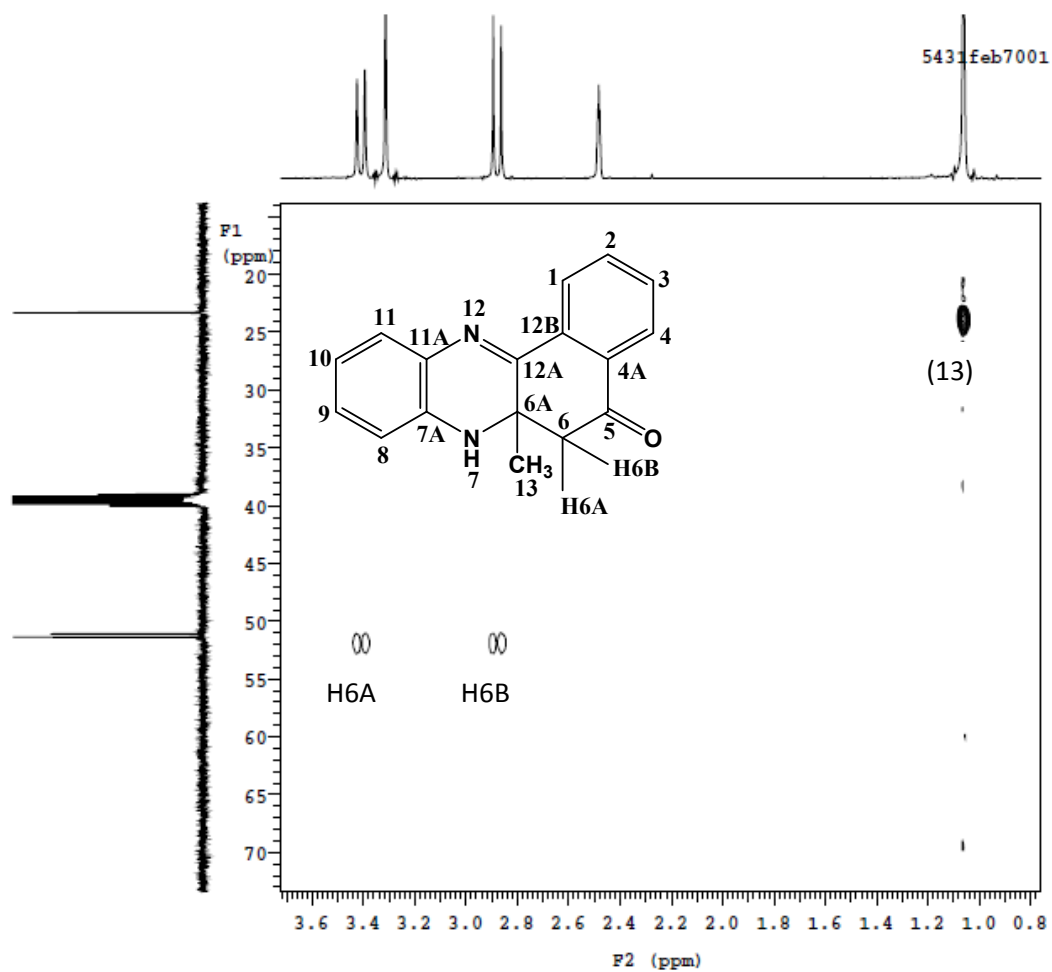

Fig.S7 2D gHSQCAD NMR spectra of **1** in saturated carbon region

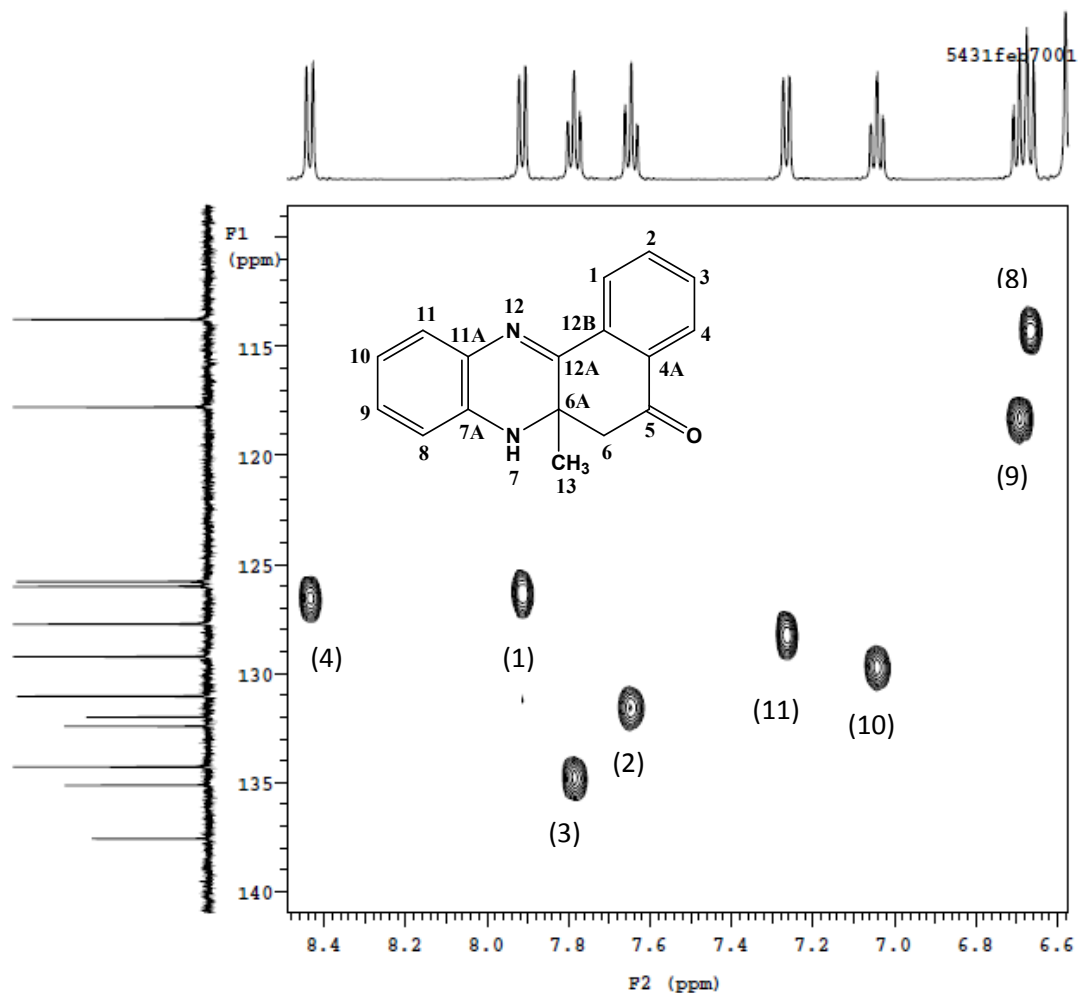

Fig.S8 2D gHSQCAD NMR spectra of **1** for aromatic carbons

**Interpretation of the 2D gHSQCAD NMR of **1** that shows the correlation between the Carbon and Proton.**

Spot (1) show the correlation between the proton i.e. observed at 7.90 ppm (C1-H) in proton NMR and the carbon observed at 125.79ppm in carbon NMR.

Spot (2) show the correlation between the proton i.e. observed at 7.64 ppm (C-2H) in proton NMR and the carbon observed at 131.05 ppm in carbon NMR.

Spot (3) show the correlation between the proton i.e. observed at 7.78 ppm (C-3H) in proton NMR and the carbon observed at 134.28 ppm in carbon NMR.

Spot (4) show the correlation between the proton i.e. observed at 8.43 ppm (C4-H) in proton NMR and the carbon observed at 126.01 ppm in carbon NMR.

Spot (H6A) show the correlation between the proton i.e. observed at 3.40 ppm (C-6H axi) in proton NMR and the carbon observed at 51.37 ppm in carbon NMR.

Spot (H6B) show the correlation between the proton i.e. observed at 2.84 ppm (C4-H) in proton NMR and the carbon observed at 51.37 ppm in carbon NMR

Spot (8) show the correlation between the proton i.e. observed at 6.67 ppm (C8-H) in proton NMR and the carbon observed at 115.60 ppm in carbon NMR.

Spot (9) show the correlation between the proton i.e. observed at 6.69 ppm (C9-H) in proton NMR and the carbon observed at 117.79 ppm in carbon NMR.

Spot (10) show the correlation between the proton i.e. observed at 7.04 ppm (C11-H) in proton NMR and the carbon observed at 129.26 ppm in carbon NMR.

Spot (11) show the correlation between the proton i.e. observed at 7.25 ppm (C11-H) in proton NMR and the carbon observed at 127.74 ppm in carbon NMR.

Spot (13) show the correlation between the proton i.e. observed at 1.06 ppm (C13-H) in proton NMR and the carbon observed at 23.30 ppm in carbon NMR.

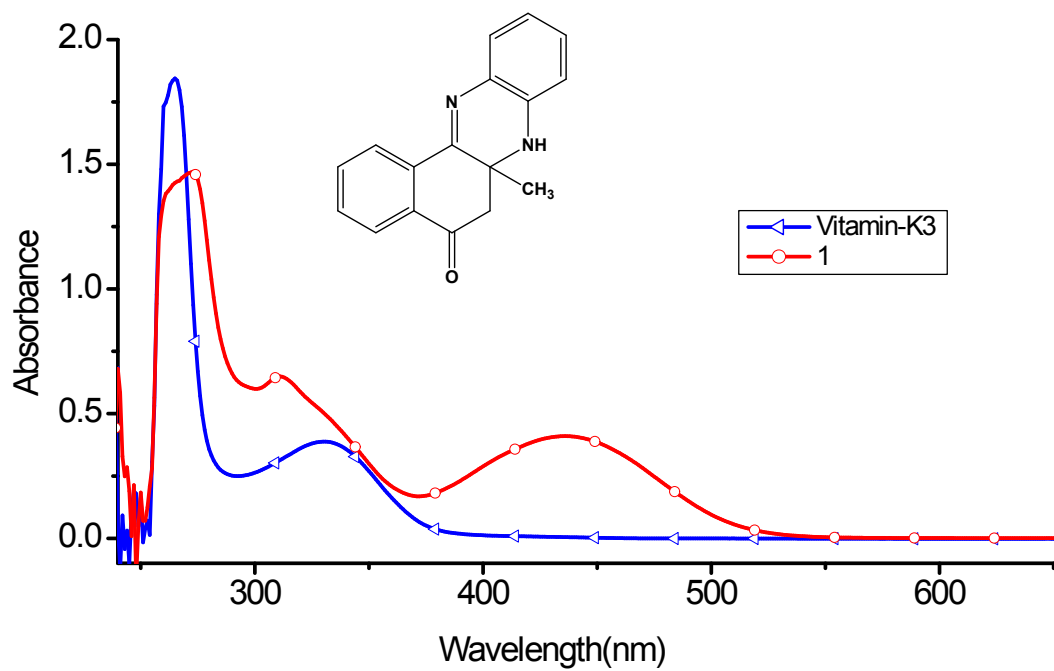

Fig.S9 UV-Visible spectra of MNQ and 1 in DMSO with concentration  $\sim 1 \times 10^{-4}$  M

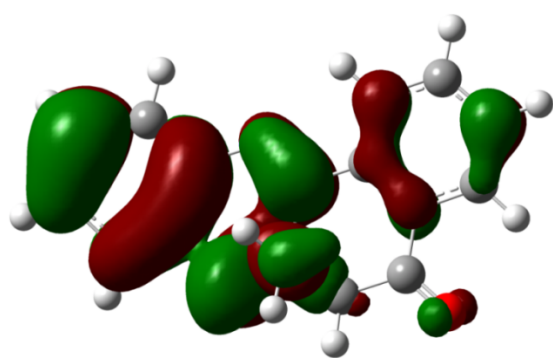

HOMO

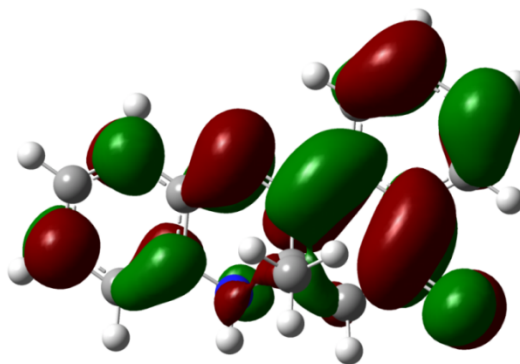

LUMO

Fig.S10 HOMO and LUMO orbital's of **1** (Isosurface value of  $-17.5 \text{ kJ mol}^{-1}$ )

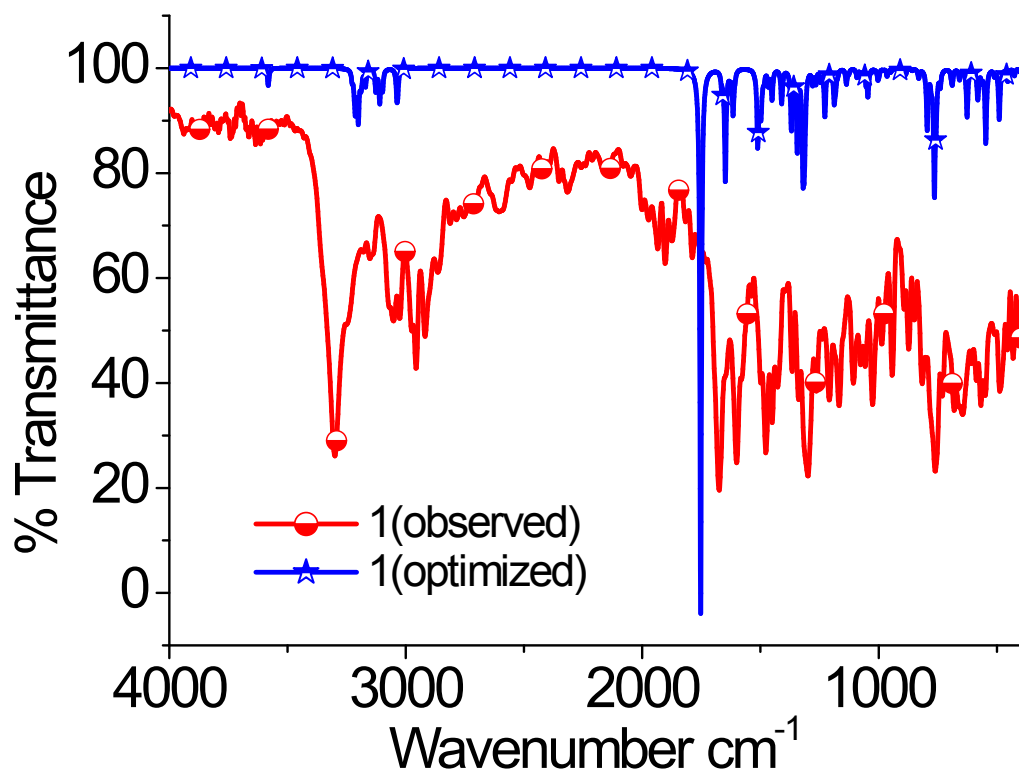

Fig.S11 Observed and optimized IR spectra of **1**



**Table S1** Crystallographic data of **1**

| Parameters                               | 1                                                |
|------------------------------------------|--------------------------------------------------|
| Formula                                  | C <sub>17</sub> H <sub>14</sub> N <sub>2</sub> O |
| Formula weight                           | 262.30                                           |
| Crystal system                           | Orthorhombic                                     |
| Space group                              | <i>Pbca</i>                                      |
| <i>a</i> /Å                              | 7.518(5)                                         |
| <i>b</i> /Å                              | 14.238(5)                                        |
| <i>c</i> /Å                              | 25.049(5)                                        |
| $\alpha$ (°)                             | 90.00                                            |
| $\beta$ (°)                              | 90.00                                            |
| $\gamma$ (°)                             | 90.00                                            |
| V(Å <sup>3</sup> )                       | 2681(2)                                          |
| Z                                        | 8                                                |
| $\rho$ (g cm <sup>-3</sup> )             | 1.300                                            |
| $\mu$ (mm <sup>-1</sup> )                | 0.082                                            |
| <i>F</i> (000)                           | 1104                                             |
| T(K)                                     | 293                                              |
| $\lambda$ (Mo K $\alpha$ )(Å)            | 0.71073                                          |
| $\Theta_{\min}$ (°)                      | 2.9                                              |
| $\Theta_{\max}$ (°)                      | 25.1                                             |
| Total data                               | 95214                                            |
| Unique data                              | 2381                                             |
| <i>R</i> <sub>int</sub>                  | 0.043                                            |
| Data[ <i>I</i> >2 $\sigma$ ( <i>I</i> )] | 2006                                             |
| <sup>a</sup> <i>R</i> <sub>1</sub>       | 0.0363                                           |
| <i>wR</i> <sub>2</sub>                   | 0.1115                                           |
| S                                        | 0.87                                             |

**Table S2** Selected bond lengths (Å) and angles (°) for **1**

|          |          |              |            |
|----------|----------|--------------|------------|
| O1-C5    | 1.217(2) | C3-C4-C4A    | 120.46(14) |
| N7-C6A   | 1.453(2) | C5-C4A-C12B  | 120.57(13) |
| N7-C7A   | 1.375(2) | C4-C4A-C12B  | 120.05(12) |
| N12-C11A | 1.405(2) | C4-C4A-C5    | 119.36(13) |
| N12-C12A | 1.285(2) | O1-C5-C4A    | 121.79(14) |
| C1- C12B | 1.393(2) | O1-C5-C6     | 121.60(14) |
| C1- C2   | 1.372(2) | C4A-C5-C6    | 116.53(13) |
| C2-C3    | 1.380(2) | C5-C6-C6A    | 114.02(12) |
| C3-C4    | 1.371(3) | N7-C6A-C13   | 112.32(11) |
| C4-C4A   | 1.389(2) | C6-C6A-C12A  | 110.76(11) |
| C4A-C12B | 1.404(2) | C6-C6A-C13   | 110.36(11) |
| C4A-C5   | 1.482(2) | C12A-C6A-C13 | 108.39(11) |
| C5-C6    | 1.492(2) | N7-C6A-C6    | 107.52(11) |
| C6-C6A   | 1.519(2) | N7-C6A-C12A  | 107.47(11) |
| C6A-C12A | 1.521(2) | N7-C7A-C8    | 123.07(12) |
| C6A-C13  | 1.536(2) | C8-C7A-C11A  | 119.27(13) |
| C7A-C11A | 1.406(2) | N7-C7A-C11A  | 117.45(12) |
| C7A-C8   | 1.388(2) | C7A-C8-C9    | 120.16(14) |
| C8-C9    | 1.379(2) | C8-C9-C10    | 120.79(15) |
| C9-C10   | 1.381(3) | C9-C10-C11   | 119.55(15) |

|               |            |               |            |
|---------------|------------|---------------|------------|
| C10-C11       | 1.378(2)   | C10-C11-C11A  | 120.75(15) |
| C11-C11A      | 1.388(2)   | N12-C11A-C11  | 119.68(14) |
| C12A-C12B     | 1.473(2)   | N12-C11A-C7A  | 120.73(13) |
| C6A-N7-C7A    | 118.16(12) | C7A-C11A-C11  | 119.44(13) |
| C11A-N12-C12A | 118.49(12) | N12-C12A-C12B | 119.42(12) |
| C7A-N7-H7N    | 118.1(10)  | C6A-C12A-C12B | 117.25(11) |
| C6A-N7-H7N    | 115.0(10)  | N12-C12A-C6A  | 123.07(12) |
| C2-C1-C12B    | 120.68(13) | C4A-C12B-C12A | 121.37(11) |
| C1-C2-C3      | 120.67(14) | C1-C12B-C4A   | 118.35(12) |
| C2- C3-C4     | 119.78(15) | C1-C12B-C12A  | 120.15(12) |
